# Supplementary material for: Polyether phases of formic acid revealed under high pressure
Source: Royal Society of Chemistry journal article supplement (doi:10.1039/d3cc02129g), 2023-01-01
Supplement: d3cc02129g1.pdf [file d3cc02129g1.pdf]

## Polyether phases of Formic acid revealed under high pressure

Himal Bhatt\*<sup>1,2</sup>, Ashok K. Verma\*<sup>1,2</sup> and P. Modak<sup>1,2</sup>

<sup>1</sup>High Pressure & Synchrotron Radiation Physics Division, Bhabha Atomic Research Centre,  
Mumbai-400 085, INDIA

<sup>2</sup>Homi Bhabha National Institute, Anushaktinagar, Mumbai-400 094, INDIA

### Electronic Supplementary Information (ESI)

#### 1. First principles evolutionary crystal structure searches and molecular dynamics

##### simulations:

Extensive first-principles evolutionary crystal structure searches were carried out at 10, 20 and 50 GPa using simulation cells of 1-4 formula units of formic acid with the help of USPEX code<sup>1-3</sup>. Over the years, this method has been established as a versatile tool for predictions of novel stoichiometries and crystal structures of materials at high pressures.<sup>4-8</sup> In recent times, this method was also used successfully to predict the crystal structures of molecular system.<sup>9-17</sup> As usual, first generation of structures was generated randomly and then these structures were fully optimized. Initial population sizes were taken 10-40 depending on total number of atoms in the unit cells. In these searches, the plane-wave basis set was generated by taking a 500 eV energy cutoff and the reciprocal space integrations were performed by employing Monkhorst-Pack method<sup>18</sup> with a grid spacing of  $2\pi \times 0.04 \text{ \AA}^{-1}$ . Energetically favorable structures were re-optimized by using a better set of computational parameters. In this set of calculations the plane-wave basis set energy cutoff was set 600 eV and reciprocal space

integration was done with a grid spacing of  $2\pi \times 0.02 \text{ \AA}^{-1}$ . Effect of the computational parameters was carefully analyzed and the chosen parameters insured the convergence of total energies better than 1.0 meV per atom. Positions of ions were relaxed until the forces on them became smaller than  $2.0 \text{ meV\AA}^{-1}$ . For all calculations, we used Perdew-Burke-Ernzerhof version of the exchange-correlation.<sup>19</sup> For structure searches, we used the VASP code<sup>20-22</sup> and projector augmented wave (PAW) potentials. Evolution of the structures was monitored at various pressures, with final enthalpy values re-computed using quantum-espresso code<sup>23</sup>. For this, we used ultrasoft pseudopotentials which were taken from the PSlibrary<sup>24</sup>, with an energy cutoff of 80 Ry and reciprocal space integrations were performed using a k-point grid of spacing  $2\pi \times 0.02 \text{ \AA}^{-1}$ . The van der Waal corrections were included in the calculations using the DFT-D2 method of Grimme et al.<sup>25</sup> For MD simulations,  $\Gamma$ -point was used for Brillouin zone sampling and time-step was taken 1 femto-second. All simulations were performed for 10 ps using ambient structure unit cell. Also, MD simulations taking larger supercell ( $2 \times 2 \times 2$ ) were carried out at ambient pressure to test the validity of our results on bond distributions (both OH covalent and H---O HB). The initial 3 ps data was discarded and a total of 7000 equilibrated configurations were used for analysis of bond-lengths. All the structure models were rendered using VESTA software.<sup>26</sup>

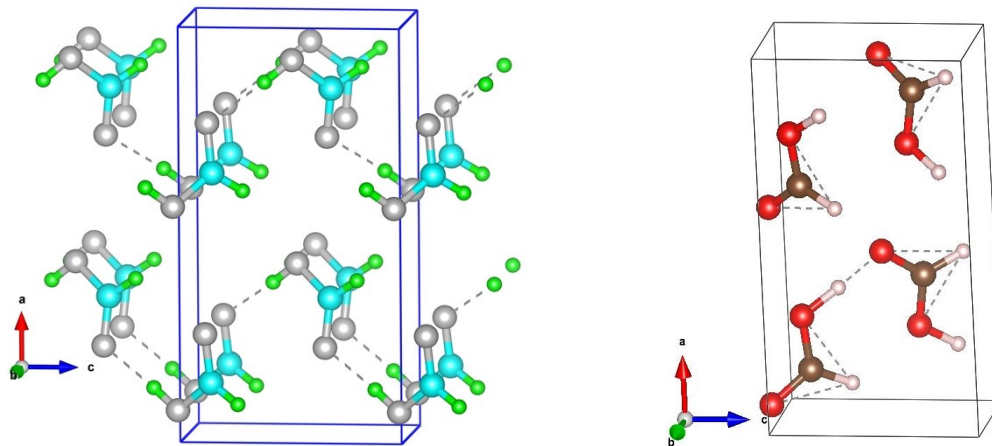

**Figure S1.** Crystal structure of Formic acid (projection in *ac*-plane): Orthorhombic **(left)** *cis Pna2<sub>1</sub>* (also shown in main text) and **(right)** *trans Pna2<sub>1</sub>* in the low pressure phase.

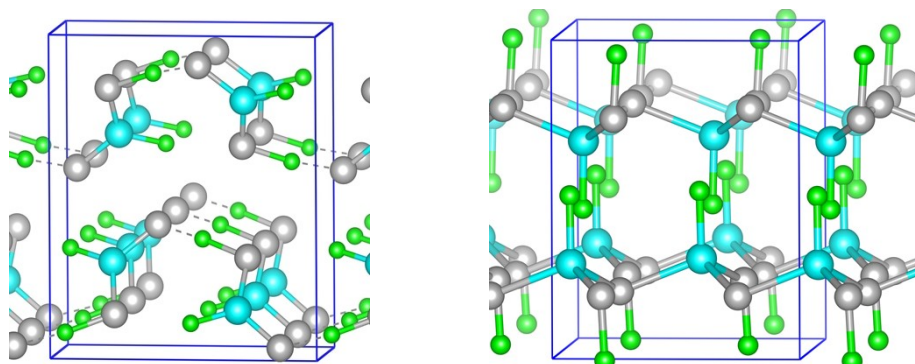

**Figure S2.** Possible crystal structures of Formic acid (projection in *ac*-plane) near 20 GPa: **(left)** orthorhombic *trans P2<sub>1</sub>2<sub>1</sub>2<sub>1</sub>* and **(right)** *polymer - Pca2<sub>1</sub>* (also shown in main text).

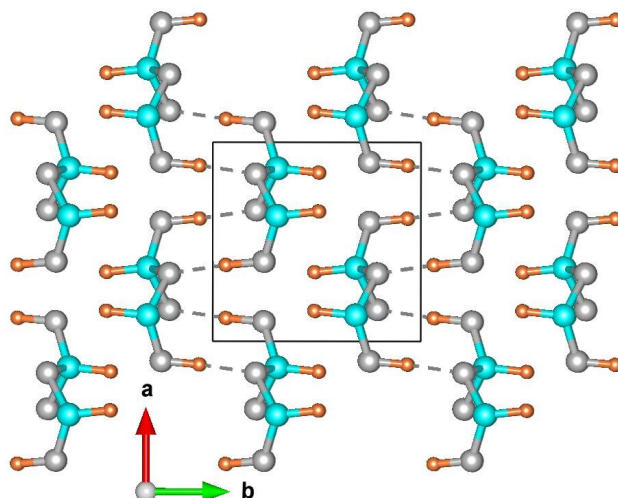

**Figure S3.** Another orientation of *polymer - Pca2<sub>1</sub>* crystal structure of Formic acid above 20 GPa. The polymer chains along *c*-axis are inter-connected by strong hydrogen bonds nearly along the *b*-axis forming bilayers in the *ab*-plane. The bilayers are further connected by weaker hydrogen bonds.

**Table S1.** Some molecular parameters of formic acid at various pressures

| Pressure (GPa)                                                 | Conformation               | O-H (Å) | H---O (Å) | O---O (Å) | ∠OHO (degree) |
|----------------------------------------------------------------|----------------------------|---------|-----------|-----------|---------------|
| 0<br>(SG33- <i>Pna2<sub>1</sub></i> )                          | <i>cis</i>                 | 1.05    | 1.49      | 2.54      | 175.72        |
| 10<br>(SG33- <i>Pna2<sub>1</sub></i> )                         | <i>cis</i>                 | 1.11    | 1.30      | 2.41      | 176.41        |
|                                                                | <i>trans</i>               | 1.09    | 1.33      | 2.43      | 175.49        |
| 20<br>(SG33- <i>Pna2<sub>1</sub></i> )                         | <i>cis</i>                 | 1.134   | 1.246     | 2.378     | 175.94        |
|                                                                | <i>trans</i>               | 1.130   | 1.25      | 2.379     | 175.93        |
| 20<br>(SG19- <i>P2<sub>1</sub>2<sub>1</sub>2<sub>1</sub></i> ) | <i>trans</i>               | 1.13    | 1.24      | 2.36      | 168.55        |
| 20<br>(SG29- <i>Pca2<sub>1</sub></i> )                         | <i>poly</i>                | 1.00    | 1.51      | 2.51      | 176.7         |
| 30<br>(SG29- <i>Pca2<sub>1</sub></i> )                         | <i>Poly (intrabilayer)</i> | 1.00    | 1.46      | 2.46      | 177.24        |
| 60<br>(SG79- <i>I4</i> )                                       | <i>Poly - rings</i>        | 1.03    | 1.40      | 2.33      | 147.20        |

**Table S2.** Fully optimized crystal structures of the Formic acid ( Here van der Waals interactions were included):

| Space group             | Pressure | Lattice parameters<br>(Å)                    | Wyckoff positions                                                                                                                                                      |
|-------------------------|----------|----------------------------------------------|------------------------------------------------------------------------------------------------------------------------------------------------------------------------|
| $P2_12_12_1$<br>No.: 19 | 25 GPa   | $a = 6.8624$<br>$b = 2.8247$<br>$c = 5.8411$ | C :4a: 0.1870, 0.7394, 0.7533<br>O1 :4a: 0.0757, 0.8290, -0.0819<br>O2 :4a: 0.3382, 0.4843, 0.7761<br>H1 :4a: 0.1097, 0.6340, 0.0992<br>H2 :4a: 0.1514, 0.8784, 0.8867 |
| $Pca2_1$<br>No.: 29     | 20 GPa   | $a = 5.0090$<br>$b = 5.3466$<br>$c = 4.0616$ | C :4a: 0.6266, 0.3133, 0.1202<br>O1 :4a: 0.6537, 0.2119, 0.8042<br>O2 :4a: 0.3940, 0.2441, 0.2472<br>H1 :4a: 0.6202, -0.0578, 0.7731<br>H2 :4a: 0.6470, 0.5155, 0.1139 |
| $I4$<br>No.: 79         | 60 GPa   | $a = b = 6.9401$<br>$c = 3.8823$             | C :8c: 0.4986, 0.2556, 0.3907<br>O1 :8c: 0.0083, 0.7575, 0.2392<br>O2 :8c: 0.3369, 0.3370, 0.2574<br>H1 :8c: 0.8849, 0.8351, 0.3187<br>H2 :8c: 0.5007, 0.1110, 0.2941  |

## **2. High Pressure Infrared Spectroscopic Studies:**

High pressure infrared spectra of crystalline formic acid, formed upon compression of liquid in a diamond anvil cell (DAC) (as in ref.<sup>27-30</sup>) were measured at various pressures. The signal to noise ratio of the spectra, recorded in reflectance mode, was poor at lower pressures and improved significantly at higher pressures. However, the transmission spectra were saturated, as also reported in some previous reports. The recorded reflectance data after normalization for

background and DAC contribution are shown in Figure S4. Some of the selected reflectance data are also shown in the main text. The spectra were recorded using Bruker Vertex 80V FTIR spectrometer equipped with KBr beamsplitter and liquid nitrogen cooled HgCdTe detector. Both, synchrotron source (100 mA, 0.45 GeV) as well as thermal source were used. A Bohler Almax plate DAC with type Ila IR diamonds of culet size 500  $\mu\text{m}$  was used for measurements in a Hyperion 2000 microscope coupled with the spectrometer. The sample was loaded in a 240  $\mu\text{m}$  thick SS gasket pre-indented to a thickness of 60  $\mu\text{m}$ . Pressure calibration was done using Ruby fluorescence. The data were modeled using a coupled oscillator model shown by solid lines in Figure S4 to determine real optical conductivity at various pressures. Approximate oscillator positions in the diamond absorption and far IR regions were assumed using ref.<sup>28, 30</sup>. The soft mode behaviour reported in ref.<sup>28</sup> could be followed up to nearly 16 GPa. The irregularities in the observed spectra up to this pressure could be explained using the conventional mode - coupling scheme.

At lower pressures, various subtle changes in our IR spectra as well as the previously reported indicate the conformational transition above 4.5 GPa in FA. Strengthening of the hydrogen bond results in the softening of  $\nu\text{C=O}$  mode (stretching;  $\sim 1630\text{ cm}^{-1}$ ). Figure 4b (main text) shows that this mode shows a minimum at 4.5 GPa, followed by broadening,<sup>28</sup> similar to the  $\nu\text{C=O}$  Raman mode behavior seen in ref.<sup>29</sup>. This implies the emergence of *trans* conformer with differing bond parameters. A peak broadening in the  $\delta\text{CO}_2$  (deformation) mode near  $700\text{ cm}^{-1}$  above 4.5 GPa in both IR and Raman spectra<sup>28</sup> is also consistent with the above inference. A rise in IR intensity at  $1200 - 1300\text{ cm}^{-1}$  region in the reported low pressure spectra above 4 GPa,<sup>28</sup> can easily be correlated with the emergence of the characteristic fingerprint mode  $\delta\text{COH-CO}$  of *trans* FA.<sup>31-32</sup>

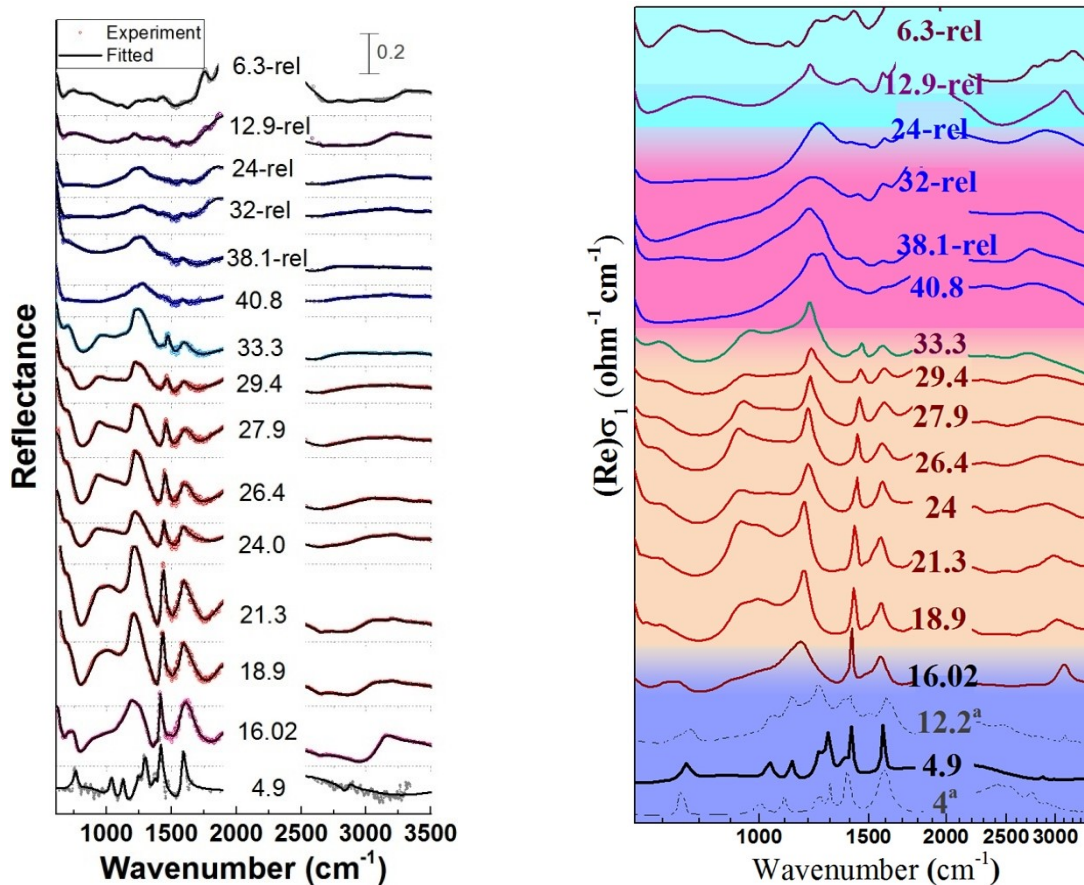

**Figure S4:** High pressure IR spectra of crystalline formic acid **(left)** Normalized reflectance data (circles) for diamond and other contributions. The data were modeled using a coupled oscillator model shown by solid lines. **(right)** The determined real optical conductivity at various pressures. Dotted patterns<sup>a</sup> are traces obtained from ref.<sup>28</sup>, showing a good match. Some of these data have also been shown in main text.

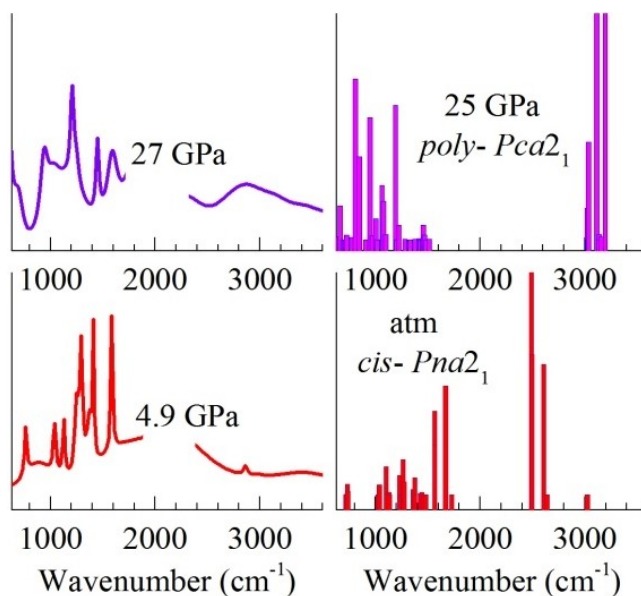

**Figure S5:** Comparison of the **(left)** experimentally obtained high pressure IR spectra of formic acid at 4.9 GPa and 27 GPa with **(right)** IR modes calculated using density functional perturbation theory, as implemented in the QE code, at ambient pressure in a  $Pna2_1$  structure and at 25 GPa in a  $Pca2_1$  structure. Among other important signatures, the evolution of polyether modes in 900 - 1200  $\text{cm}^{-1}$  spectral region and new O-H stretching signatures in 3000  $\text{cm}^{-1}$  spectral region are significant findings verifying the phase transition above 20 GPa.



**Table S3:** The most intense IR and Raman active modes of a simple polyether POM (polyoxymethylene)<sup>33-36</sup> composed of repetitive [C-O-C] units.

|                                | Crystalline POM <sup>33</sup> |       | Trigonal POM single crystal <sup>34</sup><br>(0.45 GPa) |       |                       |       | Orthorhombic POM crystal <sup>34</sup><br>(>2 GPa) |       |                       |            | Extruded POM <sup>35</sup> | POM fiber Melt spin <sup>36</sup> | High Pressure polymer of FA [our work] |                         |
|--------------------------------|-------------------------------|-------|---------------------------------------------------------|-------|-----------------------|-------|----------------------------------------------------|-------|-----------------------|------------|----------------------------|-----------------------------------|----------------------------------------|-------------------------|
|                                | IR                            | Raman | Needlelike - extended chain                             |       | Lamellar-folded chain |       | Needlelike extended chain                          |       | Lamellar folded chain |            | IR reflection              | IR absorption                     | 20 GPa                                 | dv/dp (19-34 GPa)       |
|                                |                               |       | IR                                                      | Raman | IR                    | Raman | IR                                                 | Raman | IR                    | Raman      |                            |                                   | IR                                     | (cm <sup>-1</sup> /GPa) |
| <i>v<sub>sym</sub></i><br>COC  | 903 vvs<br>932 vvs            | 919 s | 897<br>935                                              | 919   | 1002<br>935           | 919   | 936<br>895                                         | 918   | 936<br>987            | 918<br>909 | 904<br>949                 | 901                               | 925                                    | 1.73                    |
| <i>v<sub>asym</sub></i><br>COC | 1091 vvs<br>1097 vvs          |       | 1097                                                    |       | 1092<br>1136          |       | 1096<br>1133                                       |       | 1121<br>1108          |            | 1108<br>1140               | 1135                              | 1170                                   | 2.67                    |

**Table S4:** Comparison of observed (27GPa) and calculated (25GPa) prominent IR modes of FA

|                                                     | Calculated mode position (relative intensity) (cm <sup>-1</sup> ) | Experimentally observed (cm <sup>-1</sup> ) |
|-----------------------------------------------------|-------------------------------------------------------------------|---------------------------------------------|
| $\delta$ CO <sub>2</sub> (in plane)                 | 641                                                               | 692                                         |
| $\delta$ CO <sub>2</sub> (out of plane)             | 661<br>720                                                        |                                             |
| $\delta$ (COH + CH)                                 | 808<br>844                                                        |                                             |
| <i>v<sub>s</sub></i> CO (chain mode)                | 946                                                               | 936                                         |
| $\delta$ C-OH                                       | 1003<br>1061                                                      | 1026                                        |
| $\delta$ CO <sub>2</sub> + CH                       | 1075                                                              |                                             |
| <i>v<sub>a</sub></i> CO + $\delta$ OCH (chain mode) | 1097<br>1189<br>1223                                              | 1188<br>1206                                |
| $\delta$ CH                                         | 1456<br>1467                                                      | 1449                                        |
| $\delta$ (COH + CO)                                 | 1512                                                              | 1580                                        |
| <i>v</i> OH                                         | 3021<br>3034                                                      | 2918                                        |
| <i>v</i> OH + <i>v</i> CH                           | 3110                                                              | 3090                                        |
| <i>v</i> CH                                         | 3134                                                              |                                             |
| <i>v</i> CH + <i>v</i> OH                           | 3154<br>3193                                                      | 3166<br>3387                                |

**Table S5:** Formic acid computed phonon frequencies at  $\Gamma$ - point for SG33 and SG29 at 25 GPa**SG33:**

| Mode No. | $\omega$ (cm <sup>-1</sup> ) | IR Intensity | Raman Intensity |
|----------|------------------------------|--------------|-----------------|
| 1        | 0                            | 0            | 0               |
| 2        | 0                            | 0            | 0               |
| 3        | 0                            | 0            | 0               |
| 4        | 87.21                        | 0            | 1.0896          |
| 5        | 118.09                       | 0.1917       | 0.0184          |
| 6        | 125.73                       | 0.0529       | 0.8684          |
| 7        | 141.21                       | 0            | 5.6438          |
| 8        | 184.96                       | 0.0706       | 0.9796          |
| 9        | 189.34                       | 1.2294       | 12.792          |
| 10       | 202.54                       | 0            | 4.8621          |
| 11       | 204.35                       | 0.0014       | 0.8616          |
| 12       | 260.64                       | 21.1365      | 7.3369          |
| 13       | 263.89                       | 0            | 0.5396          |
| 14       | 285.2                        | 0.971        | 0.452           |
| 15       | 290.05                       | 1.7602       | 0.2698          |
| 16       | 293.19                       | 0            | 0.1702          |
| 17       | 356.66                       | 0            | 1.8092          |
| 18       | 390.42                       | 0.1522       | 9.9503          |
| 19       | 397.14                       | 20.4618      | 36.0725         |
| 20       | 406.95                       | 39.5269      | 15.6034         |
| 21       | 413.56                       | 7.8742       | 0.628           |
| 22       | 440.62                       | 24.0435      | 10.5509         |
| 23       | 460.58                       | 0            | 3.2967          |
| 24       | 494.42                       | 0.0868       | 3.0608          |
| 25       | 731.16                       | 20.369       | 53.0385         |
| 26       | 737.17                       | 6.0927       | 0.4529          |
| 27       | 787.37                       | 0            | 0.7567          |
| 28       | 792.72                       | 16.0929      | 2.7758          |
| 29       | 1050.48                      | 39.3872      | 3.2664          |
| 30       | 1050.76                      | 171.8817     | 68.8323         |
| 31       | 1067.5                       | 1.8012       | 0.3946          |
| 32       | 1070.46                      | 0            | 10.738          |
| 33       | 1081.77                      | 2.472        | 42.2058         |
| 34       | 1083.39                      | 2.2726       | 9.7739          |
| 35       | 1228.56                      | 1.139        | 34.5807         |
| 36       | 1230.74                      | 26.8356      | 0.1402          |
| 37       | 1255.67                      | 0.4751       | 1.5885          |
| 38       | 1256.78                      | 0            | 0.7397          |
| 39       | 1324.36                      | 0            | 0.4002          |

|    |         |         |           |
|----|---------|---------|-----------|
| 40 | 1341.85 | 1.5393  | 23.0796   |
| 41 | 1366.68 | 0.3295  | 111.3999  |
| 42 | 1382.15 | 46.3201 | 76.8985   |
| 43 | 1387.51 | 0.2375  | 6.5767    |
| 44 | 1391.44 | 0       | 4.4112    |
| 45 | 1411.1  | 3.3918  | 0.6181    |
| 46 | 1413.54 | 14.53   | 455.9692  |
| 47 | 1432.63 | 59.124  | 45.1123   |
| 48 | 1530.09 | 0       | 4.506     |
| 49 | 1540.41 | 44.0005 | 7.5772    |
| 50 | 1573.49 | 8.114   | 1.2347    |
| 51 | 1653.1  | 13.9118 | 0.7662    |
| 52 | 1665.85 | 0       | 11.7727   |
| 53 | 1826.13 | 43.2156 | 51.9866   |
| 54 | 1872.92 | 4.8472  | 6.1463    |
| 55 | 1899.72 | 91.612  | 20.7229   |
| 56 | 1990.77 | 0       | 19.5206   |
| 57 | 3217.79 | 2.2918  | 1038.0582 |
| 58 | 3219.17 | 0       | 75.1304   |
| 59 | 3219.44 | 0.759   | 337.1563  |
| 60 | 3219.99 | 1.0136  | 142.7398  |

**SG29:**

| <b>Mode No.</b> | <b><math>\omega</math> (cm<sup>-1</sup>)</b> | <b>IR Intensity</b> | <b>Raman Intensity</b> |
|-----------------|----------------------------------------------|---------------------|------------------------|
| 1               | 0                                            | 0                   | 0                      |
| 2               | 0                                            | 0                   | 0                      |
| 3               | 0                                            | 0                   | 0                      |
| 4               | 117                                          | 0.0889              | 1.3609                 |
| 5               | 141.11                                       | 0.0623              | 1.1992                 |
| 6               | 141.51                                       | 0                   | 0.8975                 |
| 7               | 235.16                                       | 0.8467              | 0.0999                 |
| 8               | 257.9                                        | 0                   | 2.8529                 |
| 9               | 302.58                                       | 1.3568              | 2.1807                 |
| 10              | 310.51                                       | 0.034               | 0.0071                 |
| 11              | 363.19                                       | 0                   | 0.0621                 |
| 12              | 368.66                                       | 0.0471              | 1.3855                 |
| 13              | 408.59                                       | 1.6292              | 0.0388                 |
| 14              | 408.68                                       | 0                   | 0.0029                 |
| 15              | 417.94                                       | 0.2276              | 0.5064                 |
| 16              | 444.91                                       | 0.0395              | 6.2949                 |
| 17              | 543.25                                       | 0.4665              | 52.0153                |
| 18              | 595.5                                        | 0.0087              | 0.0424                 |
| 19              | 641.64                                       | 0.6873              | 1.4646                 |

|    |         |          |          |
|----|---------|----------|----------|
| 20 | 661.53  | 8.9932   | 5.2538   |
| 21 | 690.09  | 0        | 1.0999   |
| 22 | 699.63  | 0.0362   | 0.8131   |
| 23 | 718.14  | 0        | 0.0828   |
| 24 | 720.97  | 1.2334   | 2.9132   |
| 25 | 775.28  | 0.6538   | 0.1109   |
| 26 | 808.48  | 42.6819  | 1.6792   |
| 27 | 844.18  | 21.9502  | 12.0333  |
| 28 | 908.26  | 0        | 1.8842   |
| 29 | 946.56  | 32.3049  | 5.6496   |
| 30 | 967.54  | 1.1147   | 0.0952   |
| 31 | 1003.55 | 5.5235   | 0.6855   |
| 32 | 1014.75 | 0        | 4.3657   |
| 33 | 1057.64 | 0        | 2.4427   |
| 34 | 1061.08 | 14.4626  | 0.9151   |
| 35 | 1075.8  | 10.2532  | 69.8542  |
| 36 | 1097.25 | 1.4142   | 0.7628   |
| 37 | 1189.67 | 35.6127  | 2.1331   |
| 38 | 1197.29 | 0        | 0.0014   |
| 39 | 1223.41 | 3.8243   | 7.8661   |
| 40 | 1280.3  | 0.1901   | 0.0424   |
| 41 | 1325.87 | 5E-4     | 67.5713  |
| 42 | 1330.48 | 0.0028   | 5.3238   |
| 43 | 1373.68 | 0.0142   | 0        |
| 44 | 1377.51 | 0        | 46.8584  |
| 45 | 1379.07 | 0.1002   | 38.3173  |
| 46 | 1417.13 | 0.2647   | 0.1941   |
| 47 | 1429.29 | 0.0365   | 3.0433   |
| 48 | 1447.59 | 0        | 16.9334  |
| 49 | 1456.3  | 3.7916   | 7E-4     |
| 50 | 1467.93 | 1.2724   | 9.0079   |
| 51 | 1480.86 | 0        | 35.5001  |
| 52 | 1512.33 | 0.1113   | 4.223    |
| 53 | 3021.48 | 8.2821   | 1644.691 |
| 54 | 3026.36 | 0        | 182.7568 |
| 55 | 3034.57 | 25.8967  | 39.6965  |
| 56 | 3110.52 | 150.8017 | 9.3148   |
| 57 | 3134.15 | 1.2863   | 7.3541   |
| 58 | 3136.03 | 0        | 12.2571  |
| 59 | 3154.95 | 0.7109   | 633.5191 |
| 60 | 3193.44 | 75.9392  | 45.187   |

**Figure S6:** Some prominent IR modes of FA in the polymeric phase above 20 GPa. Here, cyan ball represents C-atom, grey ball O-atom and small green ball H-atom.

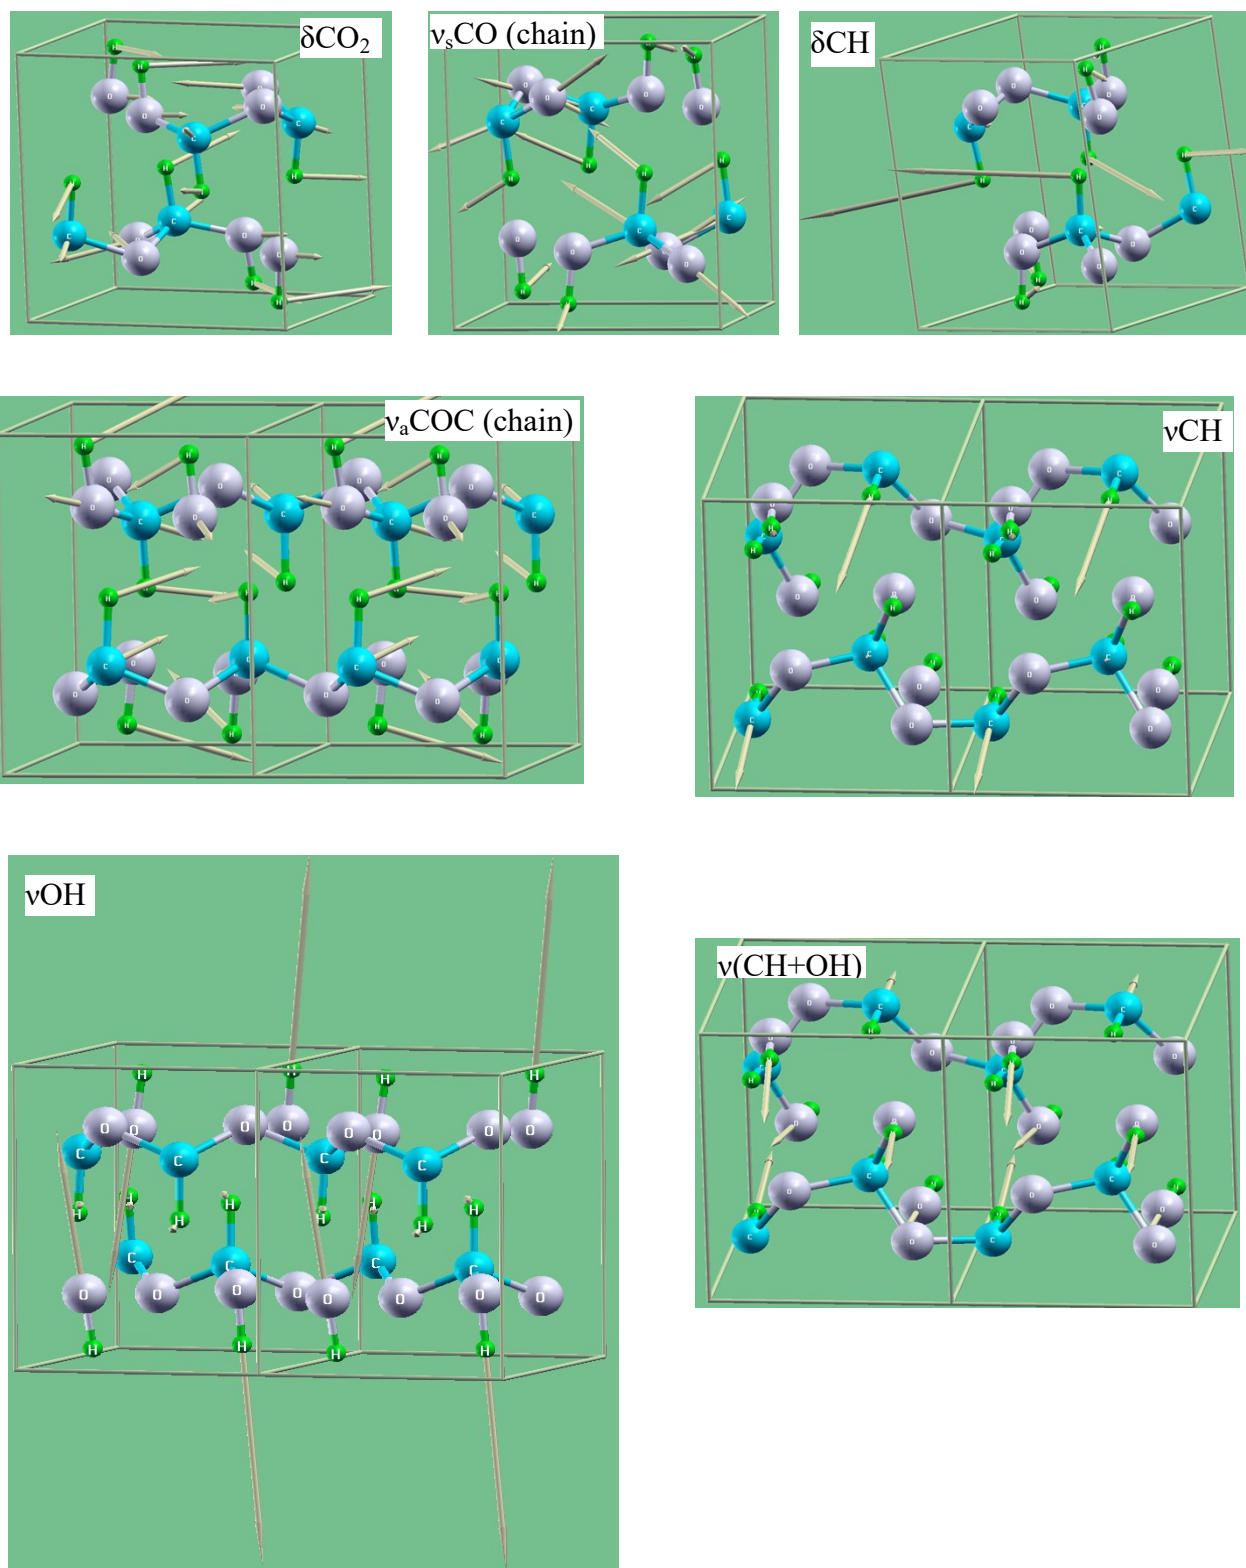

## References:

- (1) A. R. Oganov and C. W. Glass, *J. Chem. Phys.* **124**, 244704 (2006).
- (2) A. O. Lyakhov, A. R. Oganov, H. T. Stokes, and Q. Zhu, *Comput. Phys. Commun.* **184**, 1172 (2013).
- (3) A. R. Oganov, A. O. Lyakhov, and M. Valle, *Acc. Chem. Res.* **44**, 227 (2011).
- (4) A. R. Oganov and S. Ono, *Nature (London)* **430**, 445 (2004).
- (5) P. Modak and A. K. Verma, *Phys. Chem. Chem. Phys.* **21**, 13337 (2019).
- (6) A. K. Verma and P. Modak, *Phys. Chem. Chem. Phys.* **20**, 26344 (2018).
- (7) A. K. Verma, P. Modak, and L. Stixrude, *Amer. Mineral.* **103**, 1906 (2018).
- (8) A. K. Verma, P. Modak, and S. M. Sharma, *J. Alloys Compd.* **710**, 460 (2017).
- (9) A. S. Naumova, S. V. Lepeshkin, P. V. Bushlanov and A. R. Oganov, *J. Phys. Chem. A* **125**, 3936–3942 (2021).
- (10) Guang-Rui Qian, A. O. Lyakhov, Q. Zhu, A. R. Oganov and X. Dong, *Sc. Rep.* **4**, 5606 (2014).
- (11) E. Stavrou, A. A. Maryewski, S. S. Lobanov, A. R. Oganov, Z. Konôpková, V. B. Prakapenka and A. F. Goncharov, *J. Chem. Phys.* **155**, 184503 (2021).
- (12) J. K. Hinton, S. M. Clarke, B. A. Steele, I-Feng W. Kuo, E. Greenberg, V. B. Prakapenka, M. Kunz, M. P. Kroonblawd, E. Stavrou, *CrystEngComm* **21**, 4457-464 (2019).
- (13) G. Gao, A. R. Oganov, Y. Ma, H. Wang, P. Li, Y. Li, T. Iitaka and G. Zou, *J. Chem. Phys.* **133**, 144508 (2010).
- (14) A. R. Oganov, *Faraday Discuss.*, **211**, 643 (2018).
- (15) G. Saleh<sup>1</sup> and A. R. Oganov, *Sc. Rep.* **6**, 32486 (2016).

- (16) Xiao-Dong Wen, R. Hoffmann and N. W. Ashcroft, *J. Am. Chem. Soc.* **133**, 9023–9035 (2011).
- (17) Q. Zhu and S. Hattori, *J. Mat. Res.*, **38**, 19-36 (2023).
- (18) J. P. Perdew, K. Burke, and M. Ernzerhof, *Phys. Rev. Lett.* **77**, 3865 (1996).
- (19) G. Kresse and J. Hafner, *J. Phys.: Condens. Matter* **6**, 8245 (1994).
- (20) P. E. Blöchl, *Phys. Rev. B* **50**, 17953 (1994).
- (21) G. Kresse and J. Furthmüller, *Comput. Mater. Sci.* **6**, 15 (1996).
- (22) G. Kresse and D. Joubert, *Phys. Rev. B* **59**, 1758 (1999)
- (23) P. Giannozzi et al 2009 *J. Phys. Condens. Mat.* **21**1
- (24) A. Dal Corso, *Computational Material Science* 95, 337 (2014).
- (25) S. Grimme, J. Antony, S. Ehrlich and H. Krieg, *J. Chem. Phys* 132, 154104 (2010)
- (26) K. Momma and F. Izumi, *J. Appl. Crystallogr.* **44**, 1272 (2011).
- (27) D. R. Allan and S. J. Clark, *Physical Review Letters* 82, 3464 (1999).
- (28) A. F. Goncharov, M. R. Manaa, J. M. Zaug, R. H. Gee, L. E. Fried, and W. B. Montgomery, *Physical Review Letters* 94, 065505 (2005).
- (29) H. Shimizu, *Physica B+C* 139-140, 479 (1986).
- (30) V. W. Manner, R. S. Chellappa, S. A. Sheffield, Z. Liu, and D. M. Dattelbaum, *Applied Spectroscopy* 67, 1080 (2013).
- (31) M. Pettersson, J. Lundell, L. Khriachtchev, and M. Räsänen, *Journal of the American Chemical Society* 119, 11715 (1997).
- (32) J. D. Goddard, Y. Yamaguchi, and H. F. Schaefer III, *The Journal of chemical physics* 96, 1158 (1992).
- (33) Y. Matsui, T. Kubota, H. Tadokoro, and T. Yoshihara, *Journal of Polymer Science Part A: General Papers* 3, 2275 (1965)

- (34) M. Kobayashi, H. Morishita, and M. Shimomura, *Macromolecules* 22, 3726 (1989)
- (35) N. Nagai, H. Okada, Y. Amaki, M. Okamura, T. Fujii, T. Suzuki, A. Takayanagi, and S. Nakagawa, *AIP Advances* 10, 095201 (2020)
- (36) L. Li et al., *Polymers for Advanced Technologies* 26, 77 (2015)
